# Supplementary material for: Gradients of column CO 2 across North America from the NOAA Global Greenhouse Gas Reference Network
Source: Copernicus journal article supplement (doi:10.5194/acp-17-15151-2017), 2017-12-21
Supplement: Supplementary file 1 [file acp-17-15151-2017-supplement.pdf]

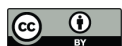

*Supplement of*

## **Gradients of column CO<sub>2</sub> across North America from the NOAA Global Greenhouse Gas Reference Network**

**Xin Lan et al.**

*Correspondence to:* Xin Lan (xin.lan@noaa.gov)

The copyright of individual parts of the supplement might differ from the CC BY 3.0 License.

| Code | Name                                                 | Latitude | Longitude | Site<br>Elevation(masl)* | Top<br>Altitude(masl) | Time start | Time end   |
|------|------------------------------------------------------|----------|-----------|--------------------------|-----------------------|------------|------------|
| AAO  | Airborne Aerosol Observatory,<br>Bondville, Illinois | 40.050   | -88.370   | 230                      | 4572                  | 06/07/2006 | 09/18/2009 |
| AMT  | Argyle, Maine (Tower)                                | 45.035   | -68.682   | 53+107                   | NA                    | 09/18/2003 | Ongoing    |
| BGI  | Bradgate, Iowa                                       | 42.820   | -94.410   | 355                      | 7620                  | 09/13/2004 | 11/18/2005 |
| BNE  | Beaver Crossing, Nebraska                            | 40.800   | -97.180   | 466                      | 8120                  | 09/15/2004 | 05/11/2011 |
| CAR  | Briggsdale, Colorado                                 | 40.635   | -104.327  | 1488                     | 8410                  | 11/09/1992 | Ongoing    |
| CMA  | Cape May, New Jersey                                 | 38.830   | -74.320   | 0                        | 7620                  | 08/17/2005 | Ongoing    |
| DND  | Dahlen, North Dakota                                 | 47.500   | -99.240   | 472                      | 8131                  | 09/21/2004 | Ongoing    |
| ESP  | Estevan Point, B C, Canada                           | 49.383   | -126.544  | 7                        | 5695                  | 11/22/2002 | Ongoing    |
| ETL  | East Trout Lake, SK, Canada                          | 54.350   | -104.983  | 492                      | 7228                  | 10/15/2005 | Ongoing    |
| FWI  | Fairchild, Wisconsin                                 | 44.660   | -90.960   | 334                      | 7620                  | 09/20/2004 | 11/18/2005 |
| HFM  | Harvard Forest, Massachusetts                        | 42.538   | -72.171   | 340                      | 7620                  | 11/11/1999 | 11/18/2007 |
| HIL  | Homer, Illinois                                      | 40.070   | -87.910   | 202                      | 8059                  | 09/16/2004 | Ongoing    |
| LEF  | Park Falls, Wisconsin                                | 45.945   | -90.273   | 472                      | 5060                  | 04/10/1998 | Ongoing    |
| LEF  | Park Falls, Wisconsin (Tower)                        | 45.945   | -90.273   | 472+396                  | NA                    | 08/01/2003 | Ongoing    |
| NHA  | Worcester, Massachusetts                             | 42.950   | -70.630   | 0                        | 7620                  | 09/12/2003 | Ongoing    |
| OIL  | Oglesby, Illinois                                    | 41.280   | -88.940   | 192                      | 7620                  | 09/16/2004 | 11/19/2005 |
| SCA  | Charleston, South Carolina                           | 32.770   | -79.550   | 0                        | 12802                 | 08/22/2003 | Ongoing    |
| SCT  | Beech Island, South Carolina (Tower)                 | 33.406   | -81.833   | 115+305                  | NA                    | 08/14/2008 | Ongoing    |
| SGP  | Southern Great Plains, Oklahoma                      | 36.607   | -97.489   | 314                      | 5330                  | 09/17/2002 | Ongoing    |
| TGC  | Sinton, Texas                                        | 27.730   | -96.860   | 0                        | 8107                  | 09/09/2003 | Ongoing    |
| THD  | Trinidad Head, California                            | 41.054   | -124.151  | 107                      | 7953                  | 09/02/2003 | Ongoing    |
| WBI  | West Branch, Iowa                                    | 41.725   | -91.353   | 242                      | 8073                  | 09/14/2004 | Ongoing    |
| WBI  | West Branch, Iowa (Tower)                            | 41.725   | -91.353   | 241.7+379                | NA                    | 06/28/2007 | Ongoing    |
| WGC  | Walnut Grove, California (Tower)                     | 38.265   | -121.491  | 0+483                    | NA                    | 09/20/2007 | Ongoing    |
| WKT  | Moody, Texas (Tower)                                 | 31.315   | -97.327   | 251+457                  | NA                    | 07/11/2003 | Ongoing    |
| MLO  | Mauna Loa, Hawaii                                    | 19.536   | -155.576  | 3397                     | NA                    | 08/20/1969 | Ongoing    |

\* In this column, number before '+' is the surface elevation, and number after '+' shows the highest intake height for the tall

tower from which data were used in this study.

**Table S1.** Site information from the NOAA/ESRL GGGRN.

| Site Code | Lat.   | Long.    | Below 800 hPa <sup>#</sup> | Below 800 hPa /CT <sup>*</sup> | Below 800 hPa Dif. <sup>&amp;</sup> | 800 to 330 hPa <sup>#</sup> | 800 to 330 hPa /CT <sup>*</sup> | 800 to 330 hPa Dif. <sup>&amp;</sup> | Total # | Total/CT <sup>*</sup> | Total Dif. <sup>&amp;</sup> | Excluded years between 2004-2014 <sup>®</sup> |
|-----------|--------|----------|----------------------------|--------------------------------|-------------------------------------|-----------------------------|---------------------------------|--------------------------------------|---------|-----------------------|-----------------------------|-----------------------------------------------|
| CAR       | 40.635 | -104.327 |                            |                                |                                     | -0.30                       | -0.74                           | -0.44                                | -0.72   | -1.26                 | -0.54                       | None                                          |
| CMA       | 38.83  | -74.32   | -4.70                      | -4.65                          | 0.05                                | -2.77                       | -1.86                           | 0.91                                 | -2.90   | -2.46                 | 0.44                        | 2004/2010/2011/2013                           |
| DND       | 47.5   | -99.24   | -9.32                      | -10.56                         | -1.24                               | -2.57                       | -2.05                           | 0.52                                 | -3.73   | -3.96                 | -0.23                       | 2004                                          |
| ESP       | 49.383 | -126.544 | -3.97                      | -3.18                          | 0.79                                | -3.10                       | -2.30                           | 0.80                                 | -3.30   | -2.79                 | 0.51                        | None                                          |
| ETL       | 54.35  | -104.983 | -7.08                      | -6.98                          | 0.10                                | -4.38                       | -3.60                           | 0.78                                 | -4.50   | -4.08                 | 0.42                        | 2004                                          |
| HIL       | 40.07  | -87.91   | -7.52                      | -9.37                          | -1.85                               | -1.36                       | -2.31                           | -0.95                                | -2.70   | -3.65                 | -0.95                       | 2004/2005/2012/2013                           |
| LEF       | 45.945 | -90.273  | -10.55                     | -10.36                         | 0.19                                | -2.90                       | -3.15                           | -0.25                                | -4.00   | -4.11                 | -0.11                       | 2006                                          |
| NHA       | 42.95  | -70.63   | -7.30                      | -6.07                          | 1.23                                | -3.10                       | -2.74                           | 0.36                                 | -3.80   | -3.32                 | 0.48                        | None                                          |
| SGP       | 36.607 | -97.489  | -0.80                      | -1.84                          | -1.04                               | -0.23                       | -0.57                           | -0.34                                | -0.80   | -1.14                 | -0.34                       | 2004/2005/2009                                |
| TGC       | 27.73  | -96.86   | 0.00                       | -0.04                          | -0.04                               | -0.05                       | 0.20                            | 0.25                                 | -0.32   | -0.33                 | -0.01                       | None                                          |
| THD       | 41.054 | -124.151 | -1.47                      | -2.31                          | -0.84                               | -1.43                       | -1.11                           | 0.32                                 | -1.65   | -1.75                 | -0.10                       | None                                          |
| WBI       | 41.725 | -91.353  | -8.27                      | -10.79                         | -2.52                               | -1.90                       | -2.19                           | -0.29                                | -3.02   | -3.67                 | -0.65                       | 2004/2011/2012/2013                           |
| SCA       | 32.77  | -79.55   | -1.67                      | -1.35                          | 0.32                                | -0.94                       | -0.50                           | 0.44                                 | -1.16   | -1.00                 | 0.16                        | None                                          |

<sup>#</sup> Values (in ppm) based on aircraft measurements.

<sup>\*</sup> Values (in ppm) based on CT2015

<sup>&</sup> Dif. (in ppm) means CT2015 minus aircraft based values

<sup>®</sup>These years are excluded when calculate column CO<sub>2</sub> based on measurements at individual aircraft site due to temporal coverage concerns, but not excluded in the mayor analysis by regions that includes more than one site.

**Table S2.** Comparisons of long-term mean (2004-2014) June-August column  $\Delta XCO_2$  from CT2015 versus total column  $\Delta XCO_2$  for 13 individual aircraft sites, corresponded to Fig.9.

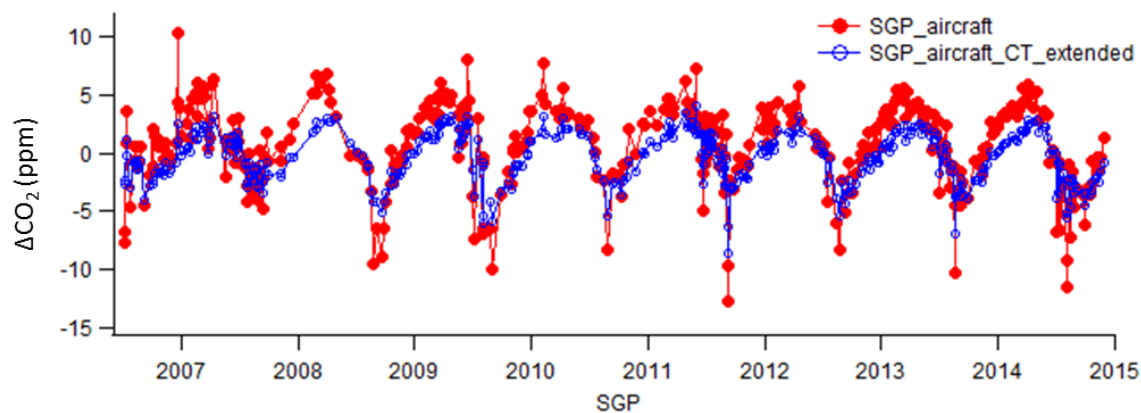

**Fig. S1.** Time series of detrended partial (red) and total (blue)  $\Delta XCO_2$  at SGP, calculated from each individual vertical profile.  $CO_2$  measurements at MLO were used to subtract the trend. (Note that some sites have lower sampling frequency that may impair their ability to capture the year-to year variation of column  $\Delta XCO_2$ , thus a long-term mean average method is utilized in this study (see section 2.3 and 3.2).

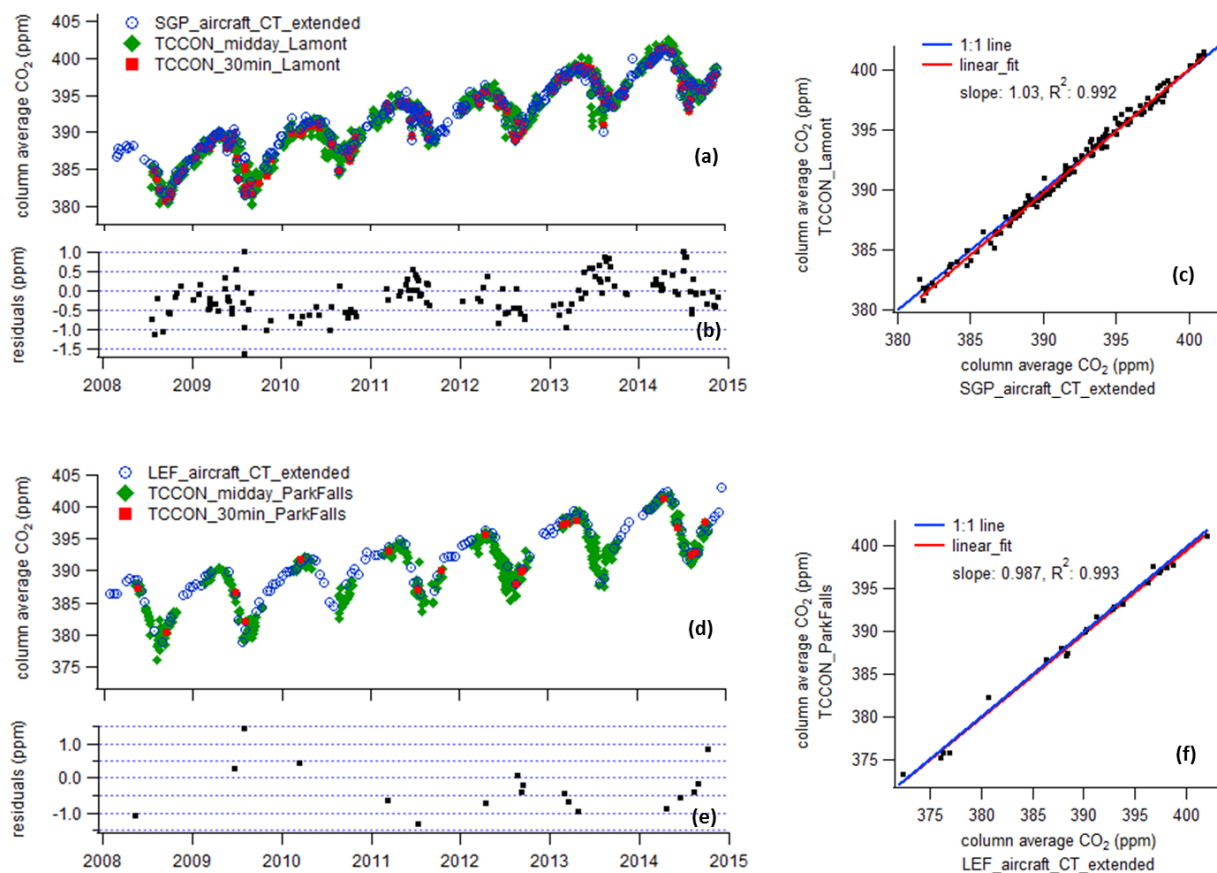

**Fig. S2** Comparisons between aircraft and CT based total column CO<sub>2</sub> with TCCON total column CO<sub>2</sub>. TCCON data with Solar Zenith Angle larger than 60° are not included in these comparisons. (a), (b), and (c) are time series, residuals (TCCON - aircraft\_CT\_extended), and scatter plot comparisons between SGP and TCCON Lamont site (36.60°N, -97.49°E), respectively. (d), (e), and (f) are the same comparisons between LEF and TCCON Park Falls site (45.94°N, -90.27°E), respectively. In (a) and (d), TCCON midday values are the averages between 10:00 to 15:00 LST; TCCON 30 min. values are the averages within 30 min. of aircraft sampling time. TCCON 30 min. values are used in (b), (c), (e), and (f).

TCCON Data DOIs:

10.14291/tccon.ggg2014.lamont01.R0/1149159

10.14291/tccon.ggg2014.parkfalls01.R0/1149161

TCCON reference:

Wunch, D., G. C. Toon, J.-F. L. Blavier, R. A. Washenfelder, J. Notholt, B. J. Connor, D. W. T. Griffith, V. Sherlock, and P. O. Wennberg (2011), The total carbon column observing network, *Philosophical Transactions of the Royal Society - Series A: Mathematical, Physical and Engineering Sciences*, 369(1643), 2087-2112, doi:10.1098/rsta.2010.0240. Available from: <http://dx.doi.org/10.1098/rsta.2010.0240>

Washenfelder, R.A., G.C. Toon, J-F. Blavier, Z. Yang, N.T. Allen P.O. Wennberg, S.A. Vay, D.M. Matross, and B.C. Daube (2006), Carbon dioxide column abundances at the Wisconsin Tall Tower site, *Journal of Geophysical Research*, 2006, 111, doi:10.1029/2006JD007154.

Wunch, D., P. O. Wennberg, G. C. Toon, G. Keppel-Aleks, and Y. G. Yavin (2009), Emissions of greenhouse gases from a North American megacity, *Geophys. Res. Lett.*, 36, L15810, doi:10.1029/2009GL039825

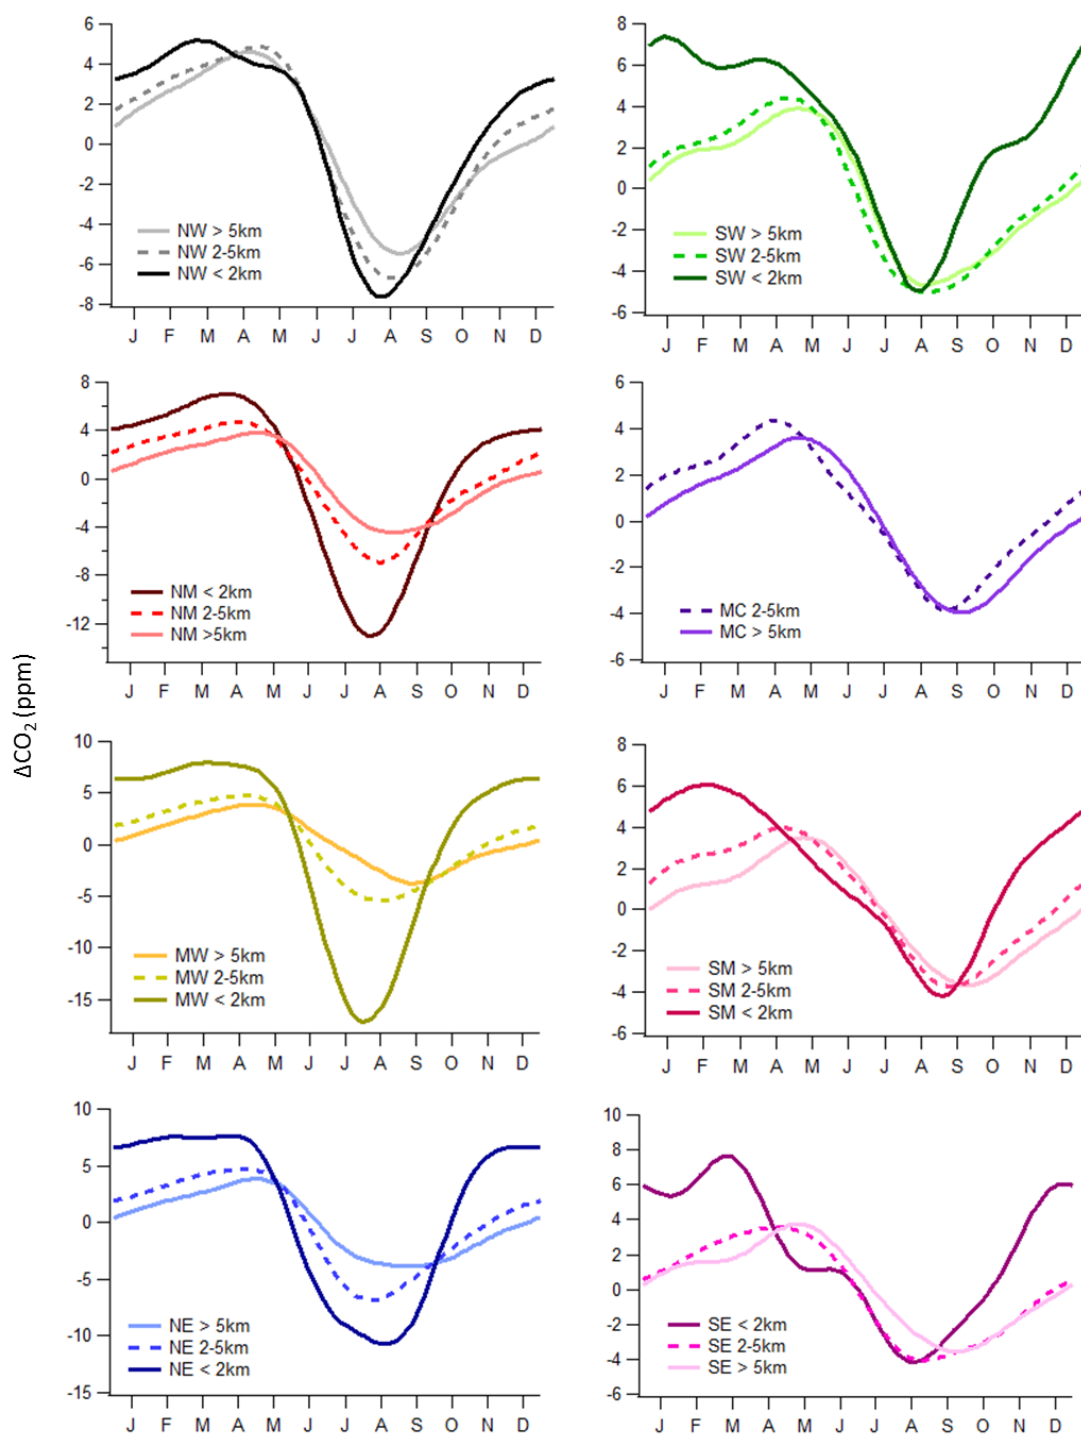

**Fig. S3.** Multi-year (2004-2014) average smooth seasonal curves of CO<sub>2</sub> relative to the long-term de-seasonalized trend at Mauna Loa for different vertical layers for each region.

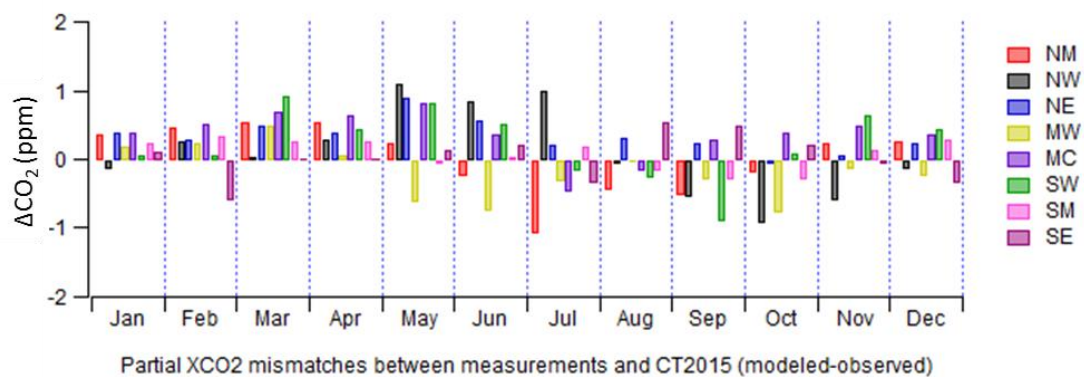

**Fig. S4.** Monthly differences of partial column  $\Delta\text{XCO}_2$  (modeled - observed) for each month, eight bars represent eight regions.



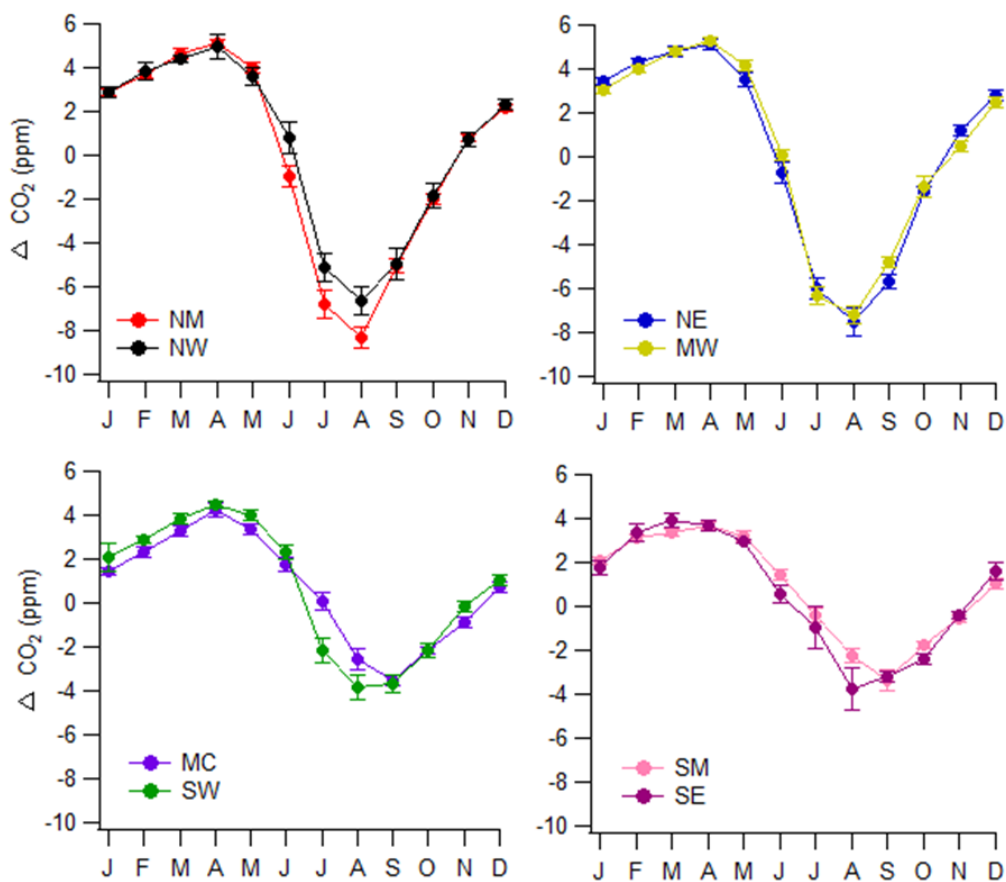

**Fig. S5.** Uncertainties estimated from ‘bootstrap’ Monte Carlo method for partial column  $\Delta XCO_2$  calculation using measured vertical profiles (aircraft and tower data). Error bar is the one standard deviation from 100 Monte Carlo runs.

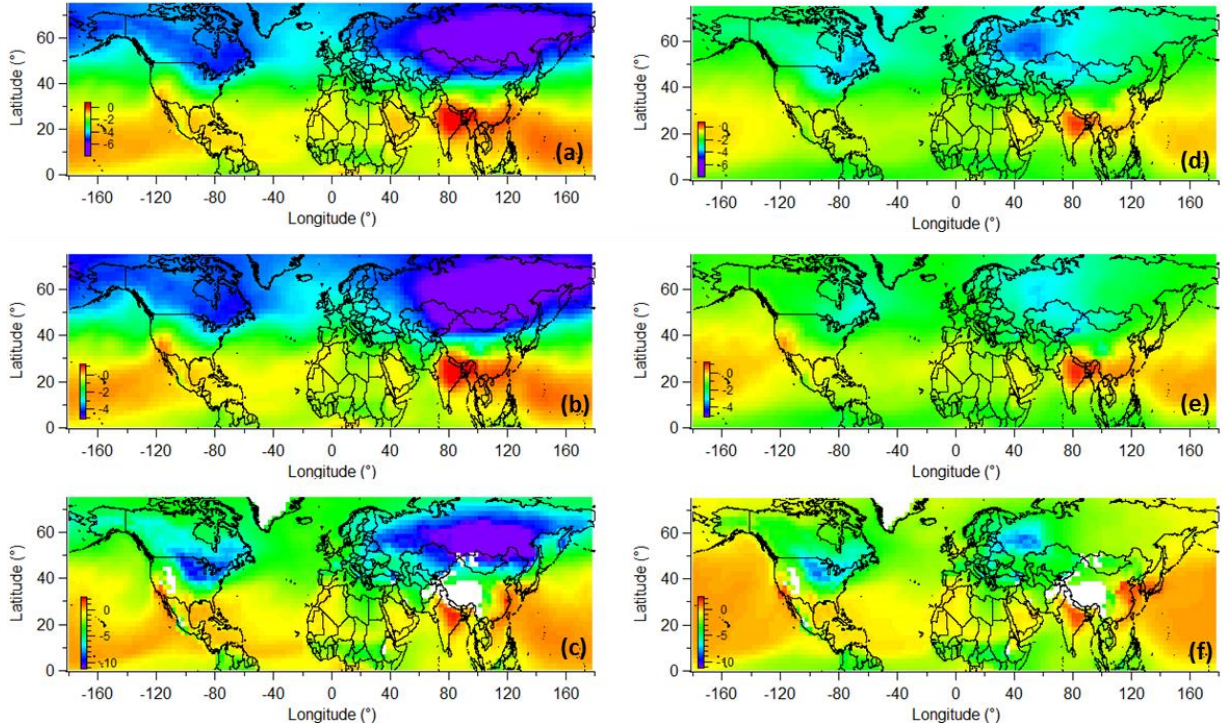

**Fig. S6.** Total and partial column  $\Delta\text{XCO}_2$  from Carbon Tracker control (left panels: (a), (b), and (c)) and masked (right panels, (d), (e), and (f), Eurasian boreal flux is masked) runs for 2012 June-August ( $3^\circ \times 2^\circ$  spatial resolution). MLO trend from each individual scenario is removed before the  $\Delta\text{XCO}_2$  calculation. (a) and (d) show total column averages, same as in Fig.10. (b) and (e) show partial column averages for free troposphere (800 hPa to 330 hPa). (c) and (f) show partial column averages for lower troposphere (below 800 hPa). (a) and (d) use the same color scale as in Fig. 9a., which reflects maximum 6 ppm gradient. Color scale in (b) and (e) also shows maximum 6 ppm gradient for comparisons with (a) and (d); however, the color values are different. Color scales in (c) and (f) are larger to reflect large spatial gradients in lower troposphere.

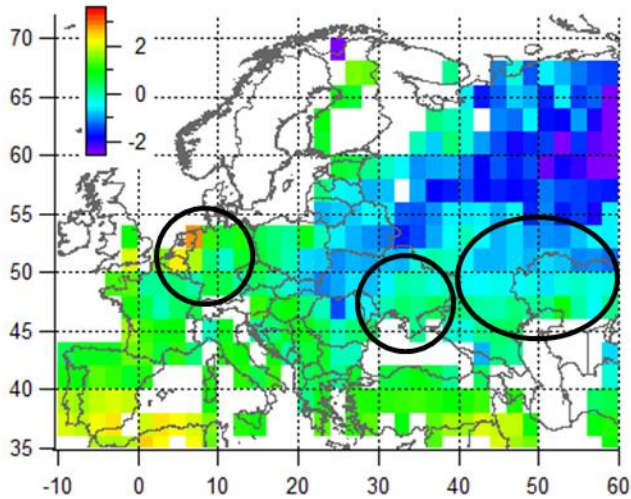

**Fig. S7.** 2003-2010 averaged June-August column CO<sub>2</sub> (in ppm) pattern from sampling CT2015 with latitude/longitude/hour from all available SCIAMACHY BESD data (v02.00.08). Black circles show the locations of extreme hot/cold spots with up to 6 ppm differences from Reuter et al. (2014), Fig.2. Seasonal mean is first removed from each year before combining 8-year data together and averaged within a  $2^0 \times 2^0$  grid. Grids with less than 24 soundings for 8 summers are excluded; color scale shows maximum 6 ppm difference, similar as Reuter et al. (2014), Fig.2.

SCIAMACHY latitude/longitude/hour information is attained from:

[http://www.esa-ghg-cci.org/sites/default/files/documents/public/documents/GHG-CCI\\_DATA.html](http://www.esa-ghg-cci.org/sites/default/files/documents/public/documents/GHG-CCI_DATA.html).

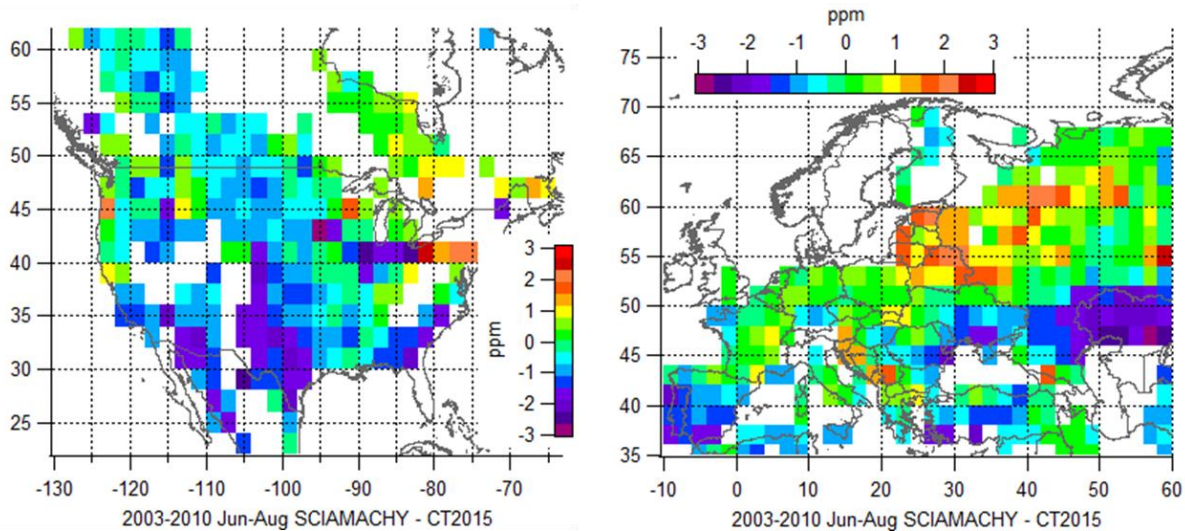

**Figure S8.** Differences between SCIAMACHY BESD column CO<sub>2</sub> and CT2015 over North America (left panel) and Europe (right Panel) for 2003-2010 June-August. CT2015 is sampled using SCIAMACHY BESD latitude/longitude/hour. Point-to-point differences (SCIAMACHY BESD – CT2015) are averaged within a  $2^0 \times 2^0$  grid. Grid cells with less than 24 soundings for 8 summers are excluded.

SCIAMACHY data is attained from:

[http://www.esa-ghg-cci.org/sites/default/files/documents/public/documents/GHG-CCI\\_DATA.html](http://www.esa-ghg-cci.org/sites/default/files/documents/public/documents/GHG-CCI_DATA.html).

SCIAMACHY BESD reference:

Reuter, M., Bovensmann, H., Buchwitz, M., Burrows, J. P., Connor, B. J., Deutscher, N. M., Griffith, D. W. T., Heymann, J., Keppel-Aleks, G., Messerschmidt, J., Notholt, J., Petri, C., Robinson, J., Schneising, O., Sherlock, V., Velazco, V., Warneke, T., Wennberg, P. O. and Wunch, D.: Retrieval of atmospheric CO<sub>2</sub> with enhanced accuracy and precision from SCIAMACHY: Validation with FTS measurements and comparison with model results, *J. Geophys. Res. Atmos.*, 116, 2011.
